# Supplementary material for: An empirically driven data reduction method on the human 450K methylation array to remove tissue specific non-variable CpGs
Source: PubMed Central journal article supplement (PMC5290610; doi:10.1186/s13148-017-0320-z), 2017-02-02
Supplement: 13148_2017_320_MOESM1_ESM.pdf [file 13148_2017_320_MOESM1_ESM.pdf]

Table 1: Series IDs of the final samples used in the meta-analysis of tissue non-variable CpGs.

| Series   | Samples | Tissue   |
|----------|---------|----------|
| GSE33233 | 19      | Blood    |
| GSE35069 | 6       | Blood    |
| GSE36369 | 20      | Blood    |
| GSE37965 | 30      | Blood    |
| GSE41169 | 95      | Blood    |
| GSE43975 | 96      | Blood    |
| GSE44798 | 50      | Blood    |
| GSE48472 | 11      | Blood    |
| GSE50475 | 5       | Blood    |
| GSE51547 | 1       | Blood    |
| GSE54399 | 24      | Blood    |
| GSE55734 | 6       | Blood    |
| GSE59592 | 6       | Blood    |
| GSE61653 | 64      | Blood    |
| GSE63499 | 23      | Blood    |
| GSE64495 | 113     | Blood    |
| GSE64950 | 36      | Blood    |
| GSE48472 | 5       | Buccal   |
| GSE50586 | 20      | Buccal   |
| GSE50759 | 96      | Buccal   |
| GSE52731 | 55      | Placenta |
| GSE54399 | 24      | Placenta |
| GSE57767 | 45      | Placenta |
| GSE62733 | 33      | Placenta |

Table 2: Terms used to exclude samples not of interest in a given tissue.

| Tissue   | Exclusion Term                                                                                                                                                                                                       |
|----------|----------------------------------------------------------------------------------------------------------------------------------------------------------------------------------------------------------------------|
| Blood    | Brain,AML,leukemia,B-cell,gyrus,cortex,PBMC,CD19+,cerebellum,peripheral,cancer,marrow,troglodytes,vaginal,B cells,Peripheral,Cord,cord,Chimpanzee,paniscus,B cells,troglodytes,gorilla,Pongo,cerebellum,cortex,gyrus |
| Buccal   | tumor                                                                                                                                                                                                                |
| Placenta | Leukocyte                                                                                                                                                                                                            |

Table 3: Quality control filters for each tissue and the resulting final study, sample and CpG numbers.

| <b>Data Processing Stage</b>                                        | <b>Blood</b> |            |                | <b>Buccal</b> |            |                | <b>Placenta</b> |            |                |
|---------------------------------------------------------------------|--------------|------------|----------------|---------------|------------|----------------|-----------------|------------|----------------|
|                                                                     | Studies      | Samples    | CpGs           | Studies       | Samples    | CpGs           | Studies         | Samples    | CpGs           |
| Original Data Collection                                            | 21           | 883        | 469,987        | 3             | 121        | 420,381        | 4               | 158        | 485,512        |
| After Removal of Samples with 2.5% NA across CpGs                   | 21           | 763        | 469,987        | 3             | 121        | 420,381        | 4               | 158        | 485,512        |
| After Removal of CpGs with 5% NA Across Samples                     | 21           | 763        | 469,961        | 3             | 121        | 420,374        | 4               | 158        | 484,621        |
| After Removal of Samples with Low Sample Correlation (Final Counts) | <b>17</b>    | <b>605</b> | <b>469,961</b> | <b>3</b>      | <b>121</b> | <b>420,374</b> | <b>4</b>        | <b>157</b> | <b>484,621</b> |

## Non-variable CpGs Lists with Alternative Processing

In order to test how robust our non-variable CpG lists are to different data processing approaches, we re-ran our analysis on the buccal studies using the normalization methods BMIQ[22] and quantile normalization. Our buccal non-variable list was robust to normalization method. The non-variable CpG lists generated from BMIQ or quantile normalized data overlapped by 96% with our original non-variable list.

Additionally the effect of cell type correction was tested by first normalizing the cell compositions of all blood samples [23,24] and then defining the non-variable CpG list on the cell composition adjusted data. Here the non-variable CpG list calculated on cell composition adjusted and unadjusted data overlapped by 90%, implying our non-variable list is robust to data processing differences.
